# Supplementary material for: Amplified fluorescence detection of adenosine via catalyzed hairpin assembly and host–guest interactions between β-cyclodextrin polymer and pyrene
Source: Royal Society of Chemistry journal article supplement (doi:10.1039/c5an02658j), 2016-01-01
Supplement: c5an02658j1.pdf [file c5an02658j1.pdf]

## Electronic Supplementary Information (ESI)

### **An Amplified Fluorescence Detection of Adenosine Strategy via Catalyzed Hairpin Assembly and Host-guest Interaction Between $\beta$ - Cyclodextrin Polymer and Pyrene**

Haihua Huang, Xiaohai Yang\*, Kemin Wang\*, Qing Wang, Qiuping Guo, Jin Huang, Jianbo Liu,

Chunxia Song

State Key Laboratory of Chemo/Biosensing and Chemometrics, College of Chemistry and

Chemical Engineering, Key Laboratory for Bio-Nanotechnology and Molecular Engineering of

Hunan Province, Hunan University, Changsha 410082, China

\*To whom correspondence should be addressed. Tel: 86-731-88821566; Fax: 86-731-  
88821566; E-mail: yangxiaohai@hnu.edu.cn, kmwang@hnu.edu.cn

**Table S1.** Oligonucleotide sequences used in this work

| Entry           | Sequence (from 5' to 3')                                               |
|-----------------|------------------------------------------------------------------------|
| Probe H1        | Pyrene-AGAGGCATCAATGGGAATGGGATCAT<br>GCCTCTAACCTAGCGATCCCATTCCCATTG    |
| Probe H2        | ATGGGATCGCTAGGT TAG AGGCATGATCCC<br>ATTCCCATACATGCCTCTAACCTAGC         |
| Aptamer-Trigger | GATCCCATTCCCATTGATGCCTCT <i>ACCTGGGGGAGT</i><br><i>ATTGCGGAGGAAGGT</i> |
| Inhibitor 1     | AGGTAGAGGCAT                                                           |
| Inhibitor 2     | CAGGTAGAGGCA                                                           |
| Inhibitor 3     | CAGGTAGAGGCAT                                                          |
| Inhibitor 4     | CAGGTAGAGGCATC                                                         |
| Inhibitor 5     | CAGGTAGAGGCATCA                                                        |
| Inhibitor 6     | CCAGGTAGAGGCATC                                                        |
| Inhibitor 7     | CAGGTAGAGGCATCAA                                                       |
| Inhibitor 8     | CCAGGTAGAGGCATCA                                                       |
| Inhibitor 9     | CCAGGTAGAGGCATCAA                                                      |

\* Aptamer sequence were marked in red and indicated as italic letters.

\*\* Pyrene linked to the 5'-terminus of probe H1 via amido bond. The spacer is - (CH<sub>2</sub>)<sub>3</sub>-CO-NH-(CH<sub>2</sub>)<sub>6</sub>- and the structural schematic diagram is as followed.

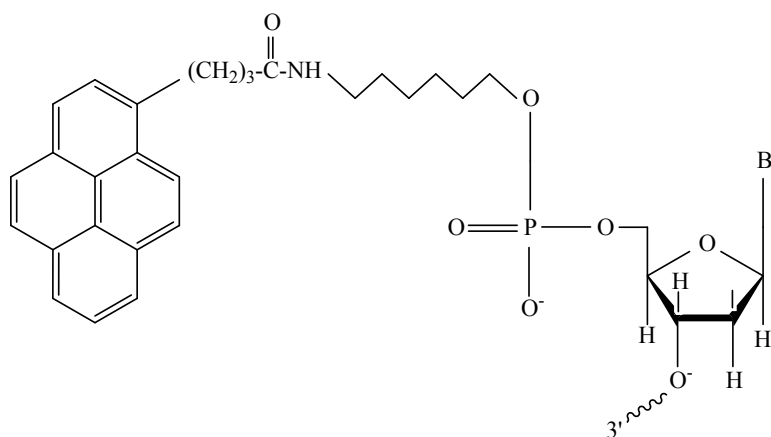

Structural schematic diagram of pyrene linked to the 5'-terminus of probe H1. B represents adenine, thymine, cytosine and guanine.

**Table S2.** Comparison of the new method with other detection strategies.

| Strategies                                | Detection limit | References |
|-------------------------------------------|-----------------|------------|
| Gold Nanoparticle Colorimetric Probes     | 0.4 mM          | S1         |
| Fast Colorimetric Sensor                  | 0.3 mM          | S2         |
| Designed aptamer and Colorimetric Sensor  | 0.25 mM         | S3         |
| Luminescent Aptamer Sensor                | 60 $\mu$ M      | S4         |
| Aptamer Folding on Gold Nanoparticles     | 20 $\mu$ M      | S5         |
| Origami Paper Analytical Device           | 11.8 $\mu$ M    | S6         |
| Label-Free Fluorescent Detection          | 3.4 $\mu$ M     | S7         |
| Amplified Colorimetric Detection          | 300 nM          | S8         |
| Aptamer-Based Chemiluminescence Detection | 80 nM           | S9         |
| Modified Pyrolytic Graphite Electrode     | 51 nM           | S10        |
| <b>This method</b>                        | <b>42 nM</b>    |            |

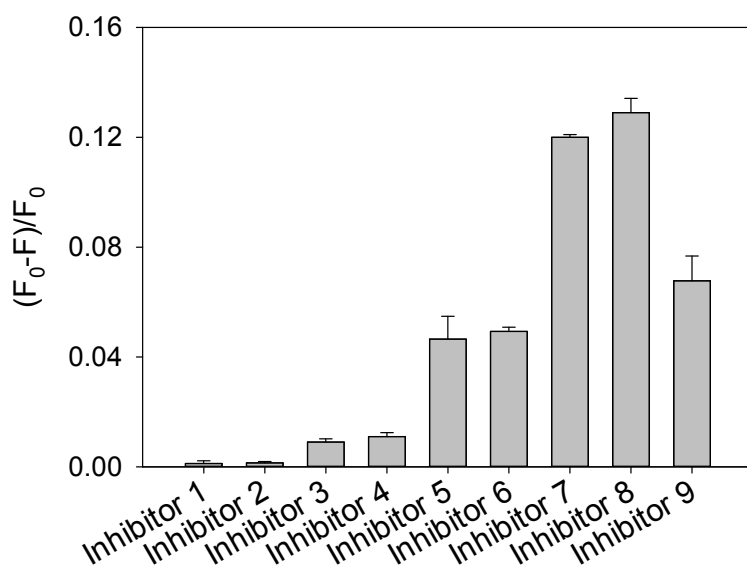

**Fig. S1.** Optimization of the length of inhibitor. Error bars indicated the standard deviations of three experiments.

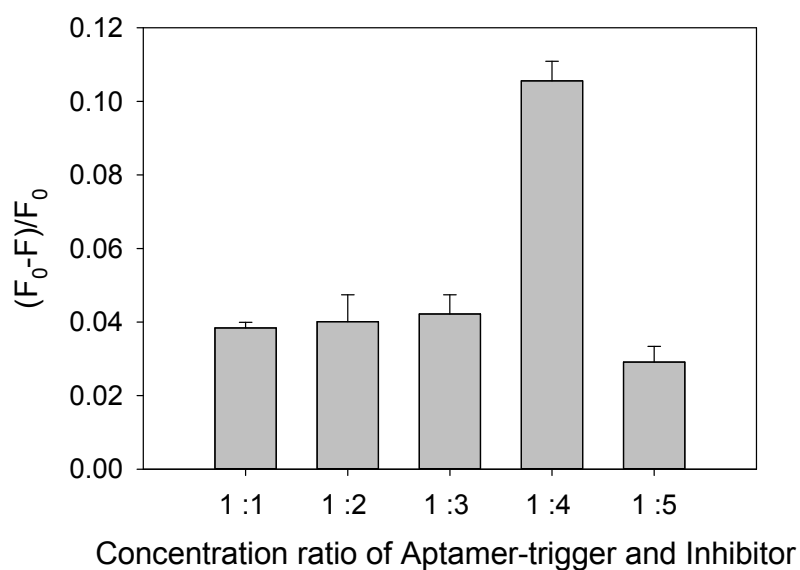

**Fig. S2.** Optimization of ratio of Aptamer-trigger and inhibitor. Concentration of Aptamer-trigger is 100 nM. Error bars indicated the standard deviations of three experiments.

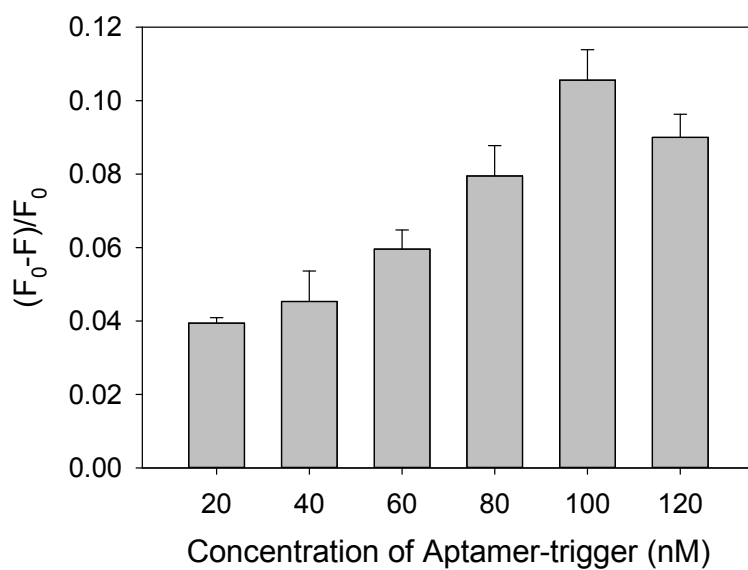

**Fig. S3.** Optimization of concentration of Aptamer-trigger. Error bars indicated the standard deviations of three experiments.

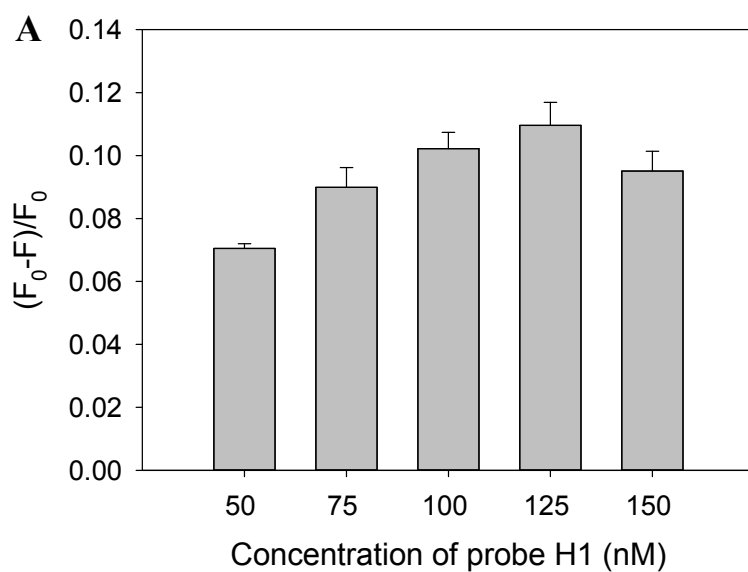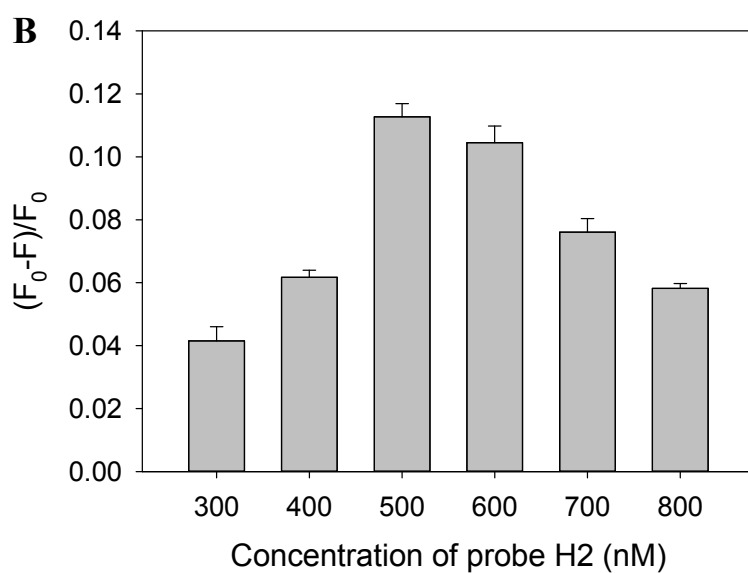

**Fig. S4.** (A) Optimization of concentration of probe H1. (B) Optimization of concentration of probe H2. Error bars indicated the standard deviations of three experiments.

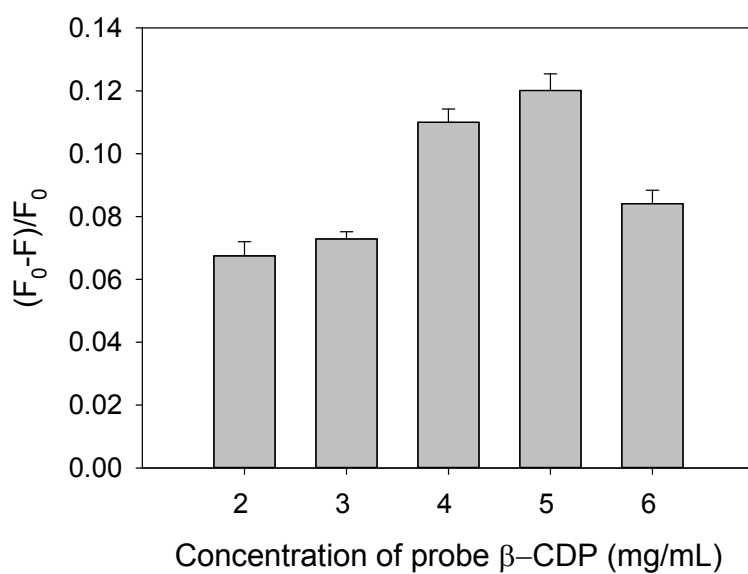

**Fig. S5.** Optimization of concentration of  $\beta$ -CDP. Error bars indicated the standard deviations of three experiments.



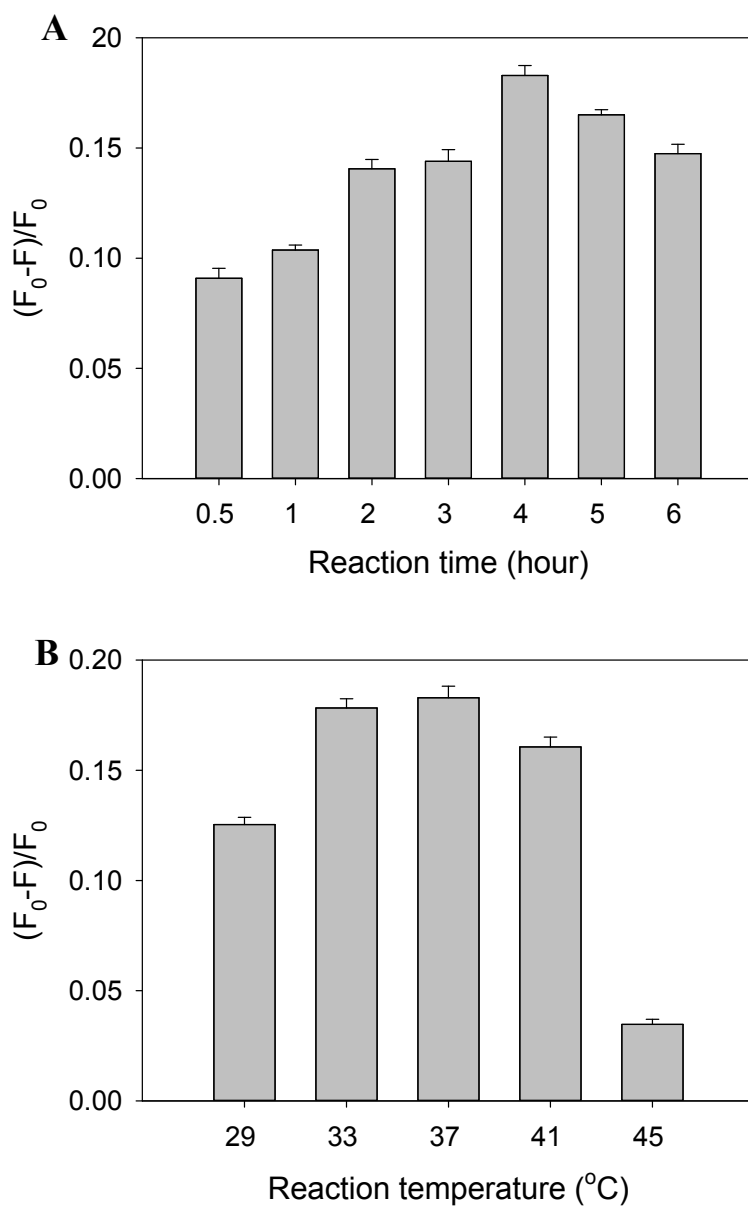

**Fig. S6.** (A) Optimization of reaction time. (B) Optimization of reaction temperature. Error bars indicated the standard deviations of three experiments.

## References

- S1. W. Zhao, M. Ali, S. Aguirre, M. Brook, Y. Li. *Anal. Chem.* 80 (2008) 8431-8437.
- S2. J. Liu, Y. Lu. *Angew. Chem. Int. Ed.* 45 (2006) 90-94.
- S3. F. Li, J. Zhang, X. Cao, L. Wang, D. Li, S. Song, B. Ye, C. Fan. *Analyst.* 134 (2009) 1355-1360.
- S4. L. Li, P. Ge, P. Selvin, Y. Lu. *Anal. Chem.* 84 (2012) 7852-7856.
- S5. W. Zhao, W. Chiuman, J. Lam, S. Mcmanus, W. Chen, Y. Cui, R. Pelton, M. Brook, Y. Li. *J. Am. Chem. Soc.* 130 (2008) 3610-3618.
- S6. H. Liu, Y. Xiang, Y. Lu, R. Crooks. *Angew. Chem. Int. Ed.* 51 (2012) 6925-6928.
- S7. Y. Xiang, A. Tong, Y. Lu. *J. Am. Chem. Soc.* 131 (2009) 15352-15357.
- S8. K. Quan, J. Huang, X. Yang, Y. Yang, L. Ying, H. Wang, Y. He, K. Wang. *Chem. Commun.* 51 (2015) 937-940.
- S9. X. Yan, Z. Cao, M. Kai, J. Lu. *Talanta.* 79 (2009) 383-387.
- S10. R. Goyal, V. Gupta, S. Chatterjee. *Talanta.* 76 (2008) 662-668.
- S11. J. Zadeh, C. Steenberg, J. Bois, B. Wolfe, M. Pierce, A. Khan, R. Dirks, N. Pierce, J. Comput. Chem. 32 (2010) 170-173.
